# Supplementary material for: Prediction of remission and recurrence of Cushing’s disease following transsphenoidal surgery (TSS): A single center, 20-year, retrospective series
Source: Research Square preprint supplement (doi:10.21203/rs.3.rs-6277838/v1), 2025-04-21
Supplement: Supplementary file 1 [file fc020f742e3ea3c70dfb164b.docx]

| **#** | **Gender** | **Age (y)** | **Year** | **MRI report** | **Size (mm)** | **Remission** |
| --- | --- | --- | --- | --- | --- | --- |
| 1 | male | 18 | 2011 | adenoma | 3.0 | yes |
| 2 | male | 58 | 2022 | adenoma | 5.0 | yes |
| 3 | male | 60 | 2012 | adenoma | 5.0 | no |
| 4 | female | 78 | 2006 | adenoma | unknown | no |
| 5 | female | 22 | 2011 | adenoma | 6.0 | no |
| 6 | female | 60 | 2020 | adenoma | 4.0 | no |
| 7 | female | 35 | 2011 | adenoma | unknown | no |
| 8 | female | 51 | 2021 | adenoma | 2.5 | no |
| 9 | female | 57 | 2014 | adenoma | 3.0 | no |
| 10 | female | 34 | 2010 | non specific | N/A | no |
| 11 | female | 59 | 2020 | adenoma | 6.0 | no |
| 12 | female | 33 | 2007 | adenoma | 2.0 | no |
| 13 | female | 55 | 2020 | suspected | N/A | no |
| 14 | female | 57 | 2020 | suspected | 4.0 | no |
| 15 | male | 67 | 2020 | non specific | N/A | no |

Supplementary Table 1. Detail of 15 cases classified as microadenomas who had no adenoma tissue at pathology. In the MRI report non specific refers to findings which were deemed not to be adenoma, while suspected referred to hypointense areas without enhancement after contrast, that were believed to be the adenoma. N/A: non applicable
